# Supplementary material for: An integrated autophagy-related gene signature predicts prognosis in human endometrial Cancer
Source: BMC Cancer. 2020 Oct 27;20:1030. doi: 10.1186/s12885-020-07535-4 (PMC7590615; doi:10.1186/s12885-020-07535-4)
Supplement: Supplementary file 3 — Additional file 3. Table S3. Immunohistochemical data of four risk ARGs. [file 12885_2020_7535_MOESM3_ESM.xlsx]

## Sheet: BIRC5 Normal
Antibody		HPA002830	HPA002830	HPA002830	HPA002831	HPA002832
Age		27	33	42	33	72
Patient id:		2004	2361	2242	2941	1978
Sample		Normal tissue, NOS (M-00100)	Normal tissue, NOS (M-00100)	Normal tissue, NOS (M-00100)	Normal tissue, NOS (M-00100)	Normal tissue, NOS (M-00100)
Cells in endometrial stroma	Staining:	Not detected	Not detected	Not detected	Low	Low
	Intensity:	Weak	Weak	Weak	Moderate	Moderate
	Quantity:	<25%	<25%	<25%	<25%	<25%
	Location:	Nuclear	Nuclear	Nuclear	Nuclear	Nuclear
Glandular cells	Staining:	Low	Low	Low	Not detected	Not detected
	Intensity:	Moderate	Moderate	Moderate	Negative	Negative
	Quantity:	<25%	<25%	<25%	None	None
	Location:	Cytoplasmic/membranous nuclea	Cytoplasmic/membranous nuclea	Cytoplasmic/membranous nuclea	None	None
ISH score		2	2	2	0	0

## Sheet: BIRC5 tumor
Antibody		HPA002830	HPA002830	HPA002830	HPA002830	HPA002830	HPA002830	HPA002830
Age		70	67	69	74	83	86	79
Patient id:		2118	2113	2236	1963	1750	1881	2339
Sample		Adenocarcinoma, NOS (M-81403)	Adenocarcinoma, NOS (M-81403)	Adenocarcinoma, NOS (M-81403)	Adenocarcinoma, NOS (M-81403)	Adenocarcinoma, NOS (M-81403)	Adenocarcinoma, NOS (M-81403)	Adenocarcinoma, NOS (M-81403)
Tumor cells	Staining:	Medium	Not detected	Low	Low	High	Low	Low
	Intensity:	Moderate	Weak	Weak	Moderate	Strong	Weak	Moderate
	Quantity:	75%-25%	<25%	>75%	<25%	75%-25%	75%-25%	<25%
	Location:	Cytoplasmic/membranous nuclea	Nuclear	Cytoplasmic/membranous nuclea	Nuclear	Nuclear	Cytoplasmic/membranous nuclea	Cytoplasmic/membranous nuclea
ISH score		6	1	4	2	6	2	2

## Sheet: CDKN2A Normal
Antibody		CAB018232	CAB018232	CAB018232	CAB018232	CAB018232	CAB018232
Age		33	39	42	50	51	68
Patient id:		2941	3313	2242	2206	3491	2342
Sample		Endometrium (T-84000)	Endometrium (T-84000)	Endometrium (T-84000)	Endometrium (T-84000)	Endometrium (T-84000)	Endometrium (T-84000)
Cells in endometrial stroma	Staining:	Not detected	Not detected	Not detected	Not detected	Not detected	Not detected
	Intensity:	Negative	Negative	Negative	Negative	Negative	Negative
	Quantity:	None	None	None	None	None	None
	Location:	None	None	None	None	None	None
Glandular cells	Staining:	Medium	Medium	Medium	Medium	Medium	Medium
	Intensity:	Moderate	Moderate	Moderate	Strong	Strong	Strong
	Quantity:	75%-25%	75%-25%	75%-25%	<25%	<25%	<25%
	Location:	Cytoplasmic/membranou	Cytoplasmic/membranou	Cytoplasmic/membranou	Cytoplasmic/membranous n uclear	Cytoplasmic/membranous n uclear	Cytoplasmic/membranous n uclear
ISH score		4	4	4	3	3	3

## Sheet: CDKN2A Tumor
Antibody		CAB018232	CAB018232	CAB018232	CAB018232	CAB018232	CAB018232	CAB018232	CAB018232	CAB018232	CAB018232	CAB018232
Age		70	63	85	58	58	70	81	53	86	79	32
Patient id:		2118	2772	3319	2621	2455	3367	2607	1766	1881	2339	3036
Sample		Adenocarcinoma, NOS (M-81403)	Adenocarcinoma, NOS (M-81403)	Adenocarcinoma, NOS (M-81403)	Adenocarcinoma, NOS (M-81403)	Adenocarcinoma, NOS (M-81403)	Adenocarcinoma, NOS (M-81403)	Adenocarcinoma, NOS (M-81403)	Adenocarcinoma, NOS (M-81403)	Adenocarcinoma, NOS (M-81403)	Adenocarcinoma, NOS (M-81403)	Adenocarcinoma, NOS (M-81403)
Tumor cells	Staining:	Medium	High	High	High	High	High	High	Low	Low	Low	Low
	Intensity:	Moderate	Strong	Strong	Strong	Strong	Strong	Strong	Moderate	Moderate	Moderate	Moderate
	Quantity:	75%-25%	75%-25%	>75%	>75%	75%-25%	75%-25%	75%-25%	<25%	<25%	<25%	<25%
	Location:	Cytoplasmic/membranou	Cytoplasmic/membranous nuclear	Cytoplasmic/membranous nuclear	Cytoplasmic/membranous nuclear	Cytoplasmic/membranous nuclear	Cytoplasmic/membranous nuclear	Cytoplasmic/membranous nuclear	Cytoplasmic/membranous nuclear	Cytoplasmic/membranous nuclear	Cytoplasmic/membranous nuclear	Cytoplasmic/membranous nuclear
ISH score		6	9	12	12	9	9	9	2	2	2	2

## Sheet: PTK6 Normal
Antibody		HPA036070	HPA036070	HPA036070	HPA036070	HPA036070
Age		24	33	39	53	72
Patient id		3364	2941	3313	1488	2535
Sample		Normal tissue, NOS (M-00100)	Normal tissue, NOS (M-00100)	Normal tissue, NOS (M-00100)	Normal tissue, NOS (M-00100)	Normal tissue, NOS (M-00100)
Cells in endometrial stroma	Staining:	Not detected	Not detected	Not detected	Not detected	Not detected
	Intensity:	Weak	Weak	Weak	Negative	Negative
	Quantity:	<25%	<25%	<25%	None	None
	Location:	Cytoplasmic/membranous	Cytoplasmic/membranous	Cytoplasmic/membranous	None	None
Glandular cells	Staining:	Not detected	Not detected	Not detected	Not detected	Not detected
	Intensity:	Weak	Weak	Weak	Negative	Negative
	Quantity:	<25%	<25%	<25%	None	None
	Location:	Cytoplasmic/membranous	Cytoplasmic/membranous	Cytoplasmic/membranous	None	None
ISH score		1	1	1	0	0

## Sheet: PTK6 Tumor
Antibody		HPA036070	HPA036070	HPA036070	HPA036070	HPA036070	HPA036070	HPA036070	HPA036070	HPA036070
Age		70	57	75	58	49	51	81	79	32
Patient id:		2118	2408	2173	2621	949	3481	2607	2339	3036
Sample		Adenocarcinoma, NOS (M-81403)	Adenocarcinoma, NOS (M-81403)	Adenocarcinoma, NOS (M-81403)	Adenocarcinoma, NOS (M-81403)	Adenocarcinoma, NOS (M-81403)	Adenocarcinoma, NOS (M-81403)	Adenocarcinoma, NOS (M-81403)	Adenocarcinoma, NOS (M-81403)	Adenocarcinoma, NOS (M-81403)
Tumor cells	Staining:	Not detected	Not detected	Not detected	Medium	Medium	Medium	Low	Not detected	Medium
	Intensity:	Weak	Weak	Weak	Moderate	Moderate	Moderate	Moderate	Weak	Moderate
	Quantity:	<25%	<25%	<25%	75%-25%	>75%	75%-25%	<25%	<25%	>75%
	Location:	Cytoplasmic/membranou	Cytoplasmic/membranou	Cytoplasmic/membranou	Cytoplasmic/membranou	Cytoplasmic/membranou	Cytoplasmic/membranou	Cytoplasmic/membranou	Cytoplasmic/membranou	Cytoplasmic/membranou
ISH score		1	1	1	6	8	6	2	1	8

## Sheet: ERBB2 Normal
Antibody		CAB000043	CAB000043	CAB000043	CAB062555	CAB062556	CAB062557
Age		35	36	36	25	33	39
Patient id:		1728	1733	1481	4876	2941	4569
Sample		Normal tissue, NOS (M-00100)	Normal tissue, NOS (M-00100)	Normal tissue, NOS (M-00100)	Normal tissue, NOS (M-00100)	Normal tissue, NOS (M-00100)	Normal tissue, NOS (M-00100)
Cells in endometrial stroma	Staining:	Not detected	Not detected	Not detected	Low	Low	Low
	Intensity:	Negative	Negative	Negative	Moderate	Moderate	Moderate
	Quantity:	None	None	None	<25%	<25%	<25%
	Location:	None	None	None	Not detected	Not detected	Not detected
Glandular cells	Staining:	Low	Low	Low	Negative	Negative	Negative
	Intensity:	Weak	Weak	Weak	None	None	None
	Quantity:	75%-25%	75%-26%	75%-27%	None	None	None
	Location:	Cytoplasmic/membranou	Cytoplasmic/membranou	Cytoplasmic/membranou	Cytoplasmic/membranou	Cytoplasmic/membranou	Cytoplasmic/membranou
ISH score		2	2	2	0	0	0

## Sheet: ERBB2 Tumor
Antibody		CAB000043	CAB000043	CAB000043	CAB000043	CAB000043	HPA001383	HPA001383	HPA001383	HPA001383	HPA001383
Age		56	75	66	75	63	79	76	63	75	59
Patient id:		309	658	1164	167	312	39	119	718	1165	575
Sample		Adenocarcinoma, NOS (M-81403)	Adenocarcinoma, NOS (M-81404)	Adenocarcinoma, NOS (M-81405)	Adenocarcinoma, NOS (M-81406)	Adenocarcinoma, NOS (M-81407)	Adenocarcinoma, NOS (M-81408)	Adenocarcinoma, NOS (M-81408)	Adenocarcinoma, NOS (M-81409)	Adenocarcinoma, NOS (M-81410)	Adenocarcinoma, NOS (M-81411)
Tumor cells	Staining:	Low	Not detected	Not detected	Low	Not detected	Low	Low	Low	Low	Low
	Intensity:	Weak	Weak	Weak	Weak	Weak	Weak	Weak	Weak	Weak	Weak
	Quantity:	75%-25%	<25%	<25%	75%-25%	<25%	75%-25%	>75%	75%-25%	75%-25%	75%-25%
	Location:	Cytoplasmic/membranous	Cytoplasmic/membranous	Cytoplasmic/membranous	Cytoplasmic/membranous	Cytoplasmic/membranous	Cytoplasmic/membranous	Cytoplasmic/membranous	Cytoplasmic/membranous	Cytoplasmic/membranous	Cytoplasmic/membranous
ISH score		3	1	1	3	1	3	4	3	3	3
