# Supplementary material for: An integrated autophagy-related gene signature predicts prognosis in human endometrial Cancer
Source: BMC Cancer. 2020 Oct 27;20:1030. doi: 10.1186/s12885-020-07535-4 (PMC7590615; doi:10.1186/s12885-020-07535-4)
Supplement: Supplementary file 4 — Additional file 4. Table S4. Clinical and pathological characteristics of high and low risk patients. [file 12885_2020_7535_MOESM4_ESM.xlsx]

## Sheet: Table S4
Table S4. Clinical and pathological characteristics of high and low risk patients.
Parameter	Risk
	Number	Low(n=270)	High(n=271）	c2	p value
Age(years)
<60	178	118	60	27.263	<0.01
≥60	361	153	208
Clinical Stage
FIGOⅠ	338	194	144	20.737	<0.01
FIGOⅡ	51	21	30
FIGOⅢ	123	48	75
FIGOⅣ	29	8	21
Diabetes
Yes	265	127	138	1.679	0.239
No	99	55	39
Neoplasm Histologic Grade
G1	98	77	21	103.299	<0.01
G2	120	92	28
G3	312	102	210
Histological Type
Endometrioid endometrial adenocarcinoma	405	263	142	142.05	<0.01
Mixed serous and endometrioid	22	1	21
Serous endometrial adenocarcinoma	114	7	107
BMI
<30	208	92	116	6.036	0.015
≥30	302	167	135
